# Supplementary material for: Neonatal outcomes and indirect consequences following maternal SARS-CoV-2 infection in pregnancy: a systematic review
Source: HighWire-hosted journal article supplement (doi:10.1136/bmjopen-2022-063052), 2023-03-01
Supplement: bmjopen-2022-063052supp002_data_supplement.pdf [file bmjopen-2022-063052supp002_data_supplement.pdf]

| Title                                                                                                                                                                                                           | Year | First author  | ID                                     | Country      | Start date | End date   | Type of study | Bias assessment | Number of mothers total | Number of case mothers | Number of babies total | Number of case babies | Population                                                                       | Exposure                                                                                 |
|-----------------------------------------------------------------------------------------------------------------------------------------------------------------------------------------------------------------|------|---------------|----------------------------------------|--------------|------------|------------|---------------|-----------------|-------------------------|------------------------|------------------------|-----------------------|----------------------------------------------------------------------------------|------------------------------------------------------------------------------------------|
| Vertical transmission and kidney damage in newborns whose mothers had coronavirus disease 2019 during pregnancy                                                                                                 | 2020 | He            | DOI: 10.1016/j.ijantimicag.2020.106260 | China        | 01/01/2020 | 01/04/2020 | Cohort        | 4               | 22                      | 22                     | 22                     | 22                    | All neonates born to mothers with COVID-19 at one centre                         | COVID-19 diagnosed on clinical criteria                                                  |
| Increased C-sections and preterm births in SARS-CoV-2 infection during pregnancy                                                                                                                                | 2021 | Carrasco      | WHO: covidwho-1250003                  | Spain        | 15/03/2020 | 31/07/2020 | Cohort        | 5               | 105                     | 105                    | 107                    | 107                   | Infected pregnant women                                                          |                                                                                          |
| Microbiological features and follow-up of neonates born to mothers with covid-19                                                                                                                                | 2021 | Vazquez       | WHO: covidwho-1250829                  | Spain        | 15/03/2020 | 30/11/2020 | Cohort        | 5               | 115                     | 115                    | 282                    | 282                   | All exposed neonates, 130 in first wave and 152 in second wave                   | Laboratory-confirmed COVID-19 infection, unclear of method of confirmation               |
| COVID-19 infection in high-risk south african pregnancies with and without HIV                                                                                                                                  | 2021 | De Waard      | WHO: covidwho-1250086                  | South Africa | 01/05/2020 | 31/07/2020 | Cohort        | 5               | 100                     | 100                    | 91                     | 91                    | All pregnant women                                                               | Laboratory-confirmed COVID-19 infection, unclear of method of confirmation               |
| The impact of the novel coronavirus infection COVID-19 on the mother-placenta-fetus system                                                                                                                      | 2021 | Nizyaeva      | DOI: 10.24075/brsmu.2021.020           | Russia       | 01/03/2020 | 01/05/2020 | Cohort        | 5               | 66                      | 66                     | 42                     | 42                    | All pregnant women. Multiple pregnancies excluded.                               | PCR-confirmed COVID-19 and control group with negative PCR test and no signs of COVID-19 |
| Clinical outcomes of maternal and neonate with COVID-19 infection - Multicenter study in Saudi Arabia                                                                                                           | 2021 | Al-Matary     | DOI: 10.1016/j.jiph.2021.03.013        | Saudi Arabia | 01/03/2020 | 01/11/2020 | Cohort        | 5               | 288                     | 288                    | 200                    | 200                   | All pregnant women                                                               | PCR-confirmed COVID-19                                                                   |
| Characteristics, clinical and laboratory data and outcomes of pregnant women with confirmed SARS-CoV-2 infection admitted to Al-Zahra tertiary referral maternity center in Iran: a case series of 24 patients  | 2021 | Vaezi         | DOI: 10.1186/s12884-021-03764-y        | Iran         | 10/03/2020 | 15/04/2020 | Cohort        | 5               | 24                      | 24                     | 11                     | 11                    | All pregnant women                                                               | Laboratory-confirmed COVID-19 infection, unclear of method of confirmation               |
| Outcomes of newborns to mothers with COVID-19                                                                                                                                                                   | 2021 | Ghema         | DOI: 10.1016/j.idnow.2021.03.003       | Morocco      | 01/01/2020 | 01/12/2020 | Cohort        | 6               | 30                      | 30                     | 30                     | 30                    | All neonates admitted to NICU whose mothers had COVID-19                         |                                                                                          |
| SARS-CoV-2 prevalence and maternal-perinatal outcomes among pregnant women admitted for delivery: Experience from COVID-19-dedicated maternity hospital in Jammu, Jammu and Kashmir (India)                     | 2021 | Gupta         | DOI: 10.1002/jmv.27074                 | India        | 01/09/2020 | 30/11/2020 | Case-control  | 6               | 3165                    | 108                    | 3165                   | 108                   | All pregnant women delivering during study period                                | PCR-confirmed COVID-19                                                                   |
| Prevalence, clinical features, and outcomes of SARS-CoV-2 infection in pregnant women with or without mild/moderate symptoms: Results from universal screening in a tertiary care center in Mexico City, Mexico | 2021 | Cardona-Perez | DOI: 10.1371/journal.pone.0249584      | Mexico       | 22/04/2020 | 25/05/2020 | Case-control  | 7               | 250                     | 70                     | 219                    | 39                    | All pregnant women who were asymptomatic or with mild/moderate COVID-19 symptoms | PCR-confirmed COVID-19                                                                   |

|                                                                                                                                                                                                                                                      |      |                      |                                       |                                              |            |            |        |   |      |      |      |      |                                                                                                           |                                                                            |
|------------------------------------------------------------------------------------------------------------------------------------------------------------------------------------------------------------------------------------------------------|------|----------------------|---------------------------------------|----------------------------------------------|------------|------------|--------|---|------|------|------|------|-----------------------------------------------------------------------------------------------------------|----------------------------------------------------------------------------|
| Course of Covid 19 and fetomaternal outcome at a tertiary care hospital                                                                                                                                                                              | 2021 | Furrukh              | ISSN: 2957-899X                       | Pakistan                                     | 08/04/2020 | 07/07/2020 | Cohort | 5 | 47   | 47   | 24   | 24   | All pregnant women                                                                                        | PCR-confirmed COVID-19                                                     |
| Clinical and obstetric characteristics of pregnant women with Covid-19: A case series study on 26 patients                                                                                                                                           | 2021 | Abedzadeh-Kalahroudi | DOI: 10.1016/j.tjog.2021.03.012       | Iran                                         | 01/03/2020 | 01/05/2020 | Cohort | 5 | 56   | 56   | 55   | 55   | All pregnant women                                                                                        | PCR or radiological diagnosis of COVID-19                                  |
| Fetal and perinatal outcome following first and second trimester covid-19 infection: Evidence from a prospective cohort study                                                                                                                        | 2021 | Rosen                | DOI: 10.3390/jcm10102152              | Israel                                       | 01/03/2020 | 01/02/2021 | Cohort | 6 | 55   | 55   | 29   | 29   | All pregnant women                                                                                        | PCR-confirmed COVID-19 before 26 weeks gestation                           |
| Hearing screening outcomes in neonates of SARS-CoV-2 positive pregnant women                                                                                                                                                                         | 2021 | Alan                 | DOI: 10.1016/j.jiporl.2021.110754     | Turkey                                       | 01/04/2020 | 01/12/2020 | Cohort | 7 | 141  | 141  | 118  | 118  | All neonates born to mothers with COVID-19, multiple gestation and risk factors for hearing loss excluded | PCR-confirmed COVID-19                                                     |
| Perinatal outcomes of pregnancies resulting from assisted reproduction technology in SARS-CoV-2-infected women: a prospective observational study                                                                                                    | 2021 | Calvo                | DOI: 10.1016/j.fertnstert.2021.04.005 | Spain                                        | 26/02/2020 | 05/11/2020 | Cohort | 6 | 1347 | 1347 | 1347 | 1347 | All pregnant women                                                                                        | PCR-confirmed COVID-19                                                     |
| The incidence, characteristics and outcomes of pregnant women hospitalized with symptomatic and asymptomatic SARS-CoV-2 infection in the UK from March to September 2020: A national cohort study using the UK Obstetric Surveillance System (UKOSS) | 2021 | Vousden              | DOI: 10.1371/journal.pone.0251123     | UK                                           | 01/03/2020 | 31/08/2020 | Cohort | 7 | 1148 | 1148 | 1019 | 1019 | All hospitalised pregnant women                                                                           | PCR-confirmed COVID-19                                                     |
| Neonatal SARS-CoV-2 infections in breastfeeding mothers                                                                                                                                                                                              | 2021 | Shlomai              | DOI: 10.1542/peds.2020-010918         | Israel                                       | 01/03/2020 | 01/05/2020 | Cohort | 5 | 53   | 53   | 55   | 55   | All pregnant women delivering during study period                                                         | PCR-confirmed COVID-19                                                     |
| COVID-19 in pregnancy-characteristics and outcomes of pregnant women admitted to hospital because of SARS-CoV-2 infection in the Nordic countries                                                                                                    | 2021 | Engjom               | DOI: 10.1111/aogs.14160               | Denmark, Finland, Iceland, Sweden and Norway | 01/03/2020 | 30/06/2020 | Cohort | 5 | 56   | 56   | 51   | 51   | All pregnant women admitted to hospital for at least 24h                                                  | PCR-confirmed SARS-CoV-2 in 14 days before admission                       |
| Consequences of SARS-CoV-2 disease on maternal, perinatal and neonatal outcomes: A retrospective observational cohort study                                                                                                                          | 2021 | Abdulghani           | DOI: 10.31083/j.ceog.2021.02.2361     | Saudi Arabia                                 | 01/03/2020 | 31/05/2020 | Cohort | 6 | 62   | 62   | 63   | 63   | All pregnant women                                                                                        | PCR-confirmed COVID-19                                                     |
| Pre and post-natal epidemiological and clinical features of neonates born from mothers infected with COVID-19 and 14-day follow-up post discharge in Lima, Peru                                                                                      | 2021 | Lizama               | DOI: 10.20453/RMH.V32i1.3942          | Peru                                         | 15/03/2020 | 30/06/2020 | Cohort | 6 | 206  | 206  | 206  | 206  | All pregnant women                                                                                        | Laboratory-confirmed COVID-19 infection, unclear of method of confirmation |
| Childbirth care among sars-cov-2 positive women in Italy                                                                                                                                                                                             | 2021 | Donati               | DOI: 10.3390/ijerph18084244           | Italy                                        | 25/02/2020 | 31/07/2020 | Cohort | 5 | 525  | 525  | 538  | 538  | All pregnant women; until end of March 2020 only symptomatic and contacts screened, then all              | PCR-confirmed COVID-19                                                     |

|                                                                                                                                                                                                     |      |             |                                        |               |            |            |              |   |       |      |       |      |                                                               |                                                                                   |
|-----------------------------------------------------------------------------------------------------------------------------------------------------------------------------------------------------|------|-------------|----------------------------------------|---------------|------------|------------|--------------|---|-------|------|-------|------|---------------------------------------------------------------|-----------------------------------------------------------------------------------|
| Association of Maternal SARS-CoV-2 Infection in Pregnancy with Neonatal Outcomes                                                                                                                    | 2021 | Norman      | DOI: 10.1001/jama.2021.5775            | Sweden        | 11/03/2020 | 31/01/2021 | Case-control | 8 | 84719 | 2286 | 88159 | 2323 | All live-born infants, malformations excluded except PDA      | PCR-confirmed COVID-19; from June 2020 all women tested vs just symptomatic women |
| Maternal and Neonatal Morbidity and Mortality among Pregnant Women with and without COVID-19 Infection: The INTERCOVID Multinational Cohort Study                                                   | 2021 | Villar      | DOI: 10.1001/jamapediatrics.2021.1050  | International | 02/03/2020 | 02/10/2020 | Case-control | 8 | 2130  | 706  | 2130  | 706  | All pregnant women                                            | PCR, radiological or clinical criteria based diagnosis of COVID-19                |
| Retrospective Analysis of Clinical Characteristics and Neonatal Outcomes of Pregnant Women with SARS-CoV-2 Infection                                                                                | 2021 | Chen        | DOI: 10.1007/s11596-021-2347-9         | China         | 01/02/2020 | 30/03/2020 | Cohort       | 5 | 8     | 8    | 9     | 9    | All pregnant women                                            | COVID-19 diagnosed on clinical criteria                                           |
| Mother-Infant Dyads with COVID-19 at an Urban, Safety-Net Hospital: Clinical Manifestations and Birth Outcomes                                                                                      | 2021 | Sabharwal   | DOI: 10.1055/s-0041-1726429            | USA           | 31/03/2020 | 06/08/2020 | Cohort       | 5 | 75    | 75   | 75    | 75   | All symptomatic pregnant women delivering during study period | PCR-confirmed COVID-19                                                            |
| Effect of SARS-CoV-2 Infection on Pregnancy Outcomes in an Inner-City Black Patient Population                                                                                                      | 2021 | Liu         | DOI: 10.1007/s10900-021-00988-z        | USA           | 10/04/2020 | 10/06/2020 | Case-control | 6 | 335   | 56   | 335   | 56   | All women who delivered                                       | PCR-confirmed COVID-19                                                            |
| Short-term developmental outcomes in neonates born to mothers with COVID-19 from Wuhan, China                                                                                                       | 2021 | Zeng        | DOI: 10.1007/s12519-021-00426-z        | China         | 01/02/2020 | 15/05/2020 | Cohort       | 6 | 68    | 68   | 72    | 72   | All neonates born to women with COVID-19                      | COVID-19 diagnosed on clinical criteria                                           |
| The Society for Obstetric Anesthesia and Perinatology (SOAP) COVID-19 Registry: An analysis of outcomes among pregnant women delivering during the initial SARS-CoV-2 outbreak in the United States | 2021 | Katz        | DOI: 10.1213/ANE.0000000000005592      | USA           | 19/03/2020 | 31/05/2020 | Case-control | 7 | 1454  | 490  | 1454  | 490  |                                                               | PCR-confirmed COVID-19 within 14 days of delivery date                            |
| Experience of covid-19 infections in neonates in tertiary care centre in North Karnataka, India: A prospective cohort study                                                                         | 2021 | Charki      | ISSN: 0971-9032                        | India         | 01/05/2020 | 01/10/2020 | Cohort       | 5 | 26    | 26   | 28    | 28   | All neonates born to women with COVID-19                      | PCR-confirmed COVID-19                                                            |
| Outcomes of Neonates Born to Mothers with Severe Acute Respiratory Syndrome Coronavirus 2 Infection at a Large Medical Center in New York City                                                      | 2021 | Dumitriu    | DOI: 10.1001/jamapediatrics.2020.4298  | USA           | 13/03/2020 | 24/04/2020 | Cohort       | 6 | 100   | 100  | 101   | 101  | All neonates born to women with COVID-19                      | PCR-confirmed COVID-19                                                            |
| Management of labour, puerperium, and lactation in SARS-CoV-2 positive women. Multicentric study in the Valencian Community.                                                                        | 2021 | Vila-Candel | DOI: 10.1016/j.enfcli.2021.01.006      | Spain         | 01/03/2020 | 30/06/2020 | Cohort       | 5 | 13    | 13   | 13    | 13   | All pregnant women who delivered                              | PCR-confirmed COVID-19                                                            |
| Impact of evolving practices on SARS-CoV-2 positive mothers and their newborns in the largest public healthcare system in America.                                                                  | 2021 | Malhotra    | DOI: 10.1038/s41372-021-01023-8        | USA           | 01/03/2020 | 09/05/2020 | Cohort       | 7 | 286   | 286  | 290   | 290  | All pregnant women who delivered                              | PCR-confirmed COVID-19                                                            |
| Characteristics and Pregnancy Outcomes of Asymptomatic and Symptomatic Women with COVID-19: Lessons from Hospitals in Wuhan.                                                                        | 2021 | Luo         | DOI: 10.3855/jidc.14010                | China         | 30/01/2020 | 15/04/2020 | Cohort       | 5 | 41    | 41   | 42    | 42   | All pregnant patients admitted                                | PCR or radiological diagnosis of COVID-19                                         |
| Association of Maternal Perinatal SARS-CoV-2 Infection With Neonatal                                                                                                                                | 2021 | Angelidou   | DOI: 10.1001/jamanetworkopen.2021.7523 | USA           | 01/03/2020 | 31/07/2020 | Cohort       | 6 | 250   | 250  | 255   | 255  | All mother-infant dyads whose delivery and                    | PCR-confirmed COVID-19                                                            |

|                                                                                                                                                                        |      |                |                                    |        |            |            |              |   |      |      |      |      |                                                   |                                                                   |
|------------------------------------------------------------------------------------------------------------------------------------------------------------------------|------|----------------|------------------------------------|--------|------------|------------|--------------|---|------|------|------|------|---------------------------------------------------|-------------------------------------------------------------------|
| Outcomes During the COVID-19 Pandemic in Massachusetts.                                                                                                                |      |                |                                    |        |            |            |              |   |      |      |      |      | discharge fell within the study period            |                                                                   |
| SARS-CoV-2 infection in pregnant women and newborns in a Spanish cohort (GESNEO-COVID) during the first wave.                                                          | 2021 | Carrasco       | DOI: 10.1186/s12884-021-03784-8    | Spain  | 15/03/2020 | 31/07/2020 | Cohort       | 6 | 105  | 105  | 107  | 107  | All pregnant women delivering during study period | PCR, serological or clinical criteria based diagnosis of COVID-19 |
| Pregnancy and perinatal outcomes of women with coronavirus disease (COVID-19) pneumonia: a preliminary analysis.                                                       | 2020 | Liu            | DOI: 10.2214/AJR.20.23072          | China  | 20/01/2020 | 10/02/2020 | Cohort       | 6 | 11   | 11   | 11   | 11   |                                                   | PCR-confirmed COVID-19                                            |
| Characteristics and outcomes of pregnant women admitted to hospital with confirmed SARS-CoV-2 infection in UK: national population based cohort study.                 | 2020 | Knight         | DOI: 10.1136/bmj.m2107             | U.K    | 01/03/2020 | 14/04/2020 | Cohort       | 7 | 427  | 427  | 259  | 259  |                                                   | PCR-confirmed COVID-19                                            |
| Clinical features and outcomes of pregnant women suspected of coronavirus disease 2019.                                                                                | 2020 | Yang           | DOI: 10.1016/j.jinf.2020.04.003    | China  | 20/01/2020 | 05/03/2020 | Case-control | 6 | 55   | 13   | 57   | 13   | All pregnant women delivering during study period | PCR-confirmed COVID-19                                            |
| Clinical features and obstetric and neonatal outcomes of pregnant patients with COVID-19 in Wuhan, China: a retrospective, single-centre, descriptive study.           | 2020 | Yu             | DOI: 10.1016/S1473-3099(20)30176-6 | China  | 01/01/2020 | 08/02/2020 | Cohort       | 6 | 7    | 7    | 7    | 7    |                                                   | PCR-confirmed COVID-19                                            |
| Covid-19 in pregnant women: General data from a French National Survey.                                                                                                | 2020 | Cohen          | DOI: 10.1186/s12958-020-00605      | France | Not stated |            | Cohort       | 4 | 88   | 88   | 14   | 14   |                                                   | PCR, serological or radiological diagnosis of COVID-19            |
| Association Between Mode of Delivery Among Pregnant Women With COVID-19 and Maternal and Neonatal Outcomes in Spain.                                                   | 2020 | Martinez-Perez | DOI: 10.1001/jama.2020.10125       | Spain  | 12/03/2020 | 06/04/2020 | Cohort       | 7 | 82   | 82   | 78   | 78   |                                                   | PCR-confirmed COVID-19                                            |
| Vaginal delivery in SARS-CoV-2-infected pregnant women in Northern Italy: a retrospective analysis.                                                                    | 2020 | Ferrazzi       | DOI: 10.1111/1471-0528.16278       | Italy  | 01/03/2020 | 20/03/2020 | Cohort       | 5 | 42   | 42   | 42   | 42   |                                                   | PCR-confirmed COVID-19                                            |
| Characteristics and Outcomes of 241 Births to Women With Severe Acute Respiratory Syndrome Coronavirus 2 (SARS-CoV-2) Infection at Five New York City Medical Centers. | 2020 | Khoury         | DOI: 10.1097/AOG.0000000000004025. | USA    | 12/03/2020 | 12/04/2020 | Cohort       | 6 | 241  | 241  | 245  | 245  |                                                   | PCR-confirmed COVID-19                                            |
| Evaluating Clinical Course and Risk Factors of Infection and Demographic Characteristics of Pregnant Women with COVID-19 in Hamadan Province, West of Iran.            | 2020 | Sattari        | DOI: 10.34172/jrhs.2020.22         | Iran   | 06/01/2020 | 21/06/2020 | Cohort       | 6 | 50   | 50   | 25   | 25   |                                                   | COVID-19 diagnosed on clinical criteria                           |
| Birth and Infant Outcomes Following Laboratory-Confirmed SARS-CoV-2 Infection in Pregnancy                                                                             | 2020 | Woodworth      | DOI: 10.15585/mmwr.mm6944e2.       | USA    | 29/03/2020 | 14/10/2020 | Cohort       | 5 | 5252 | 5252 | 4495 | 4495 |                                                   | ?                                                                 |
| Pregnant women with COVID-19 and risk of adverse birth outcomes and maternal-fetal vertical transmission: a population-based cohort study in Wuhan, China.             | 2020 | Yang           | DOI: 10.1186/s12916-020-01798-1    | China  | 13/01/2020 | 18/03/2020 | Cohort       | 6 | 65   | 65   | 58   | 58   |                                                   | PCR or clinical criteria based diagnosis of COVID-19              |

|                                                                                                                                                                     |      |                    |                                    |        |            |            |        |   |     |     |     |     |                                                           |
|---------------------------------------------------------------------------------------------------------------------------------------------------------------------|------|--------------------|------------------------------------|--------|------------|------------|--------|---|-----|-----|-----|-----|-----------------------------------------------------------|
| Maternal and neonatal outcomes in COVID-19 infected pregnancies: a prospective cohort study.                                                                        | 2020 | Pirjani            | DOI: 10.1093/jtm/taaa158           | Iran   | 01/03/2020 | 01/09/2020 | Cohort | 8 | 43  | 43  | 43  | 43  | PCR-confirmed COVID-19                                    |
| Neonatal outcome in 29 pregnant women with COVID-19: A retrospective study in Wuhan, China.                                                                         | 2020 | Wu                 | DOI: 10.1371/journal.pmed.1003195  | China  | 30/01/2020 | 10/03/2020 | Cohort | 5 | 29  | 29  | 29  | 29  | PCR or radiological diagnosis of COVID-19                 |
| Pregnancy and postpartum outcomes in a universally tested population for SARS-CoV-2 in New York City: a prospective cohort study.                                   | 2020 | Prabhu             | DOI: 10.1111/1471-0528.16403       | USA    | 24/03/2020 | 20/04/2020 | Cohort | 8 | 70  | 70  | 69  | 69  | PCR-confirmed COVID-19                                    |
| SARS-CoV-2 infection among hospitalized pregnant women: reasons for admission and pregnancy characteristics - eight U.S. health care centers, March 1-May 30, 2020. | 2020 | Panagiotakopoulos  | DOI: 10.15585/mmwr.mm6938e2.       | USA    | 01/03/2020 | 30/05/2020 | Cohort | 5 | 105 | 105 | 93  | 93  | All hospitalised pregnant women<br>PCR-confirmed COVID-19 |
| Characteristics and maternal and birth outcomes of hospitalized pregnant women with laboratory-confirmed COVID-19 - COVID-NET, 13 states, March 1-August 22, 2020.  | 2020 | Delahoy            | DOI: 10.15585/mmwr.mm6938e1.       | USA    | 01/03/2020 | 22/08/2020 | Cohort | 6 | 458 | 458 | 448 | 448 | PCR-confirmed COVID-19                                    |
| Safety of vaginal delivery in women infected with COVID-19.                                                                                                         | 2021 | Lopian             | DOI: 10.1016/j.pedneo.2020.10.010. | Israel | 23/03/2020 | 08/05/2020 | Cohort | 5 | 21  | 21  | 21  | 21  | PCR-confirmed COVID-19                                    |
| Pregnancy with COVID-19 infection and fetomaternal outcomes.                                                                                                        | 2021 | Sharma             | DOI: 10.14260/jemds/2021/5         | India  | 21/04/2020 | 07/09/2020 | Cohort | 6 | 125 | 125 | 97  | 97  | PCR-confirmed COVID-19                                    |
| Severe acute respiratory syndrome coronavirus 2 (SARS-CoV-2) universal screening in gravids during labor and delivery.                                              | 2021 | Saviron-Cornudella | DOI: 10.1016/j.ejogrb.2020.11.069. | Spain  | 31/03/2020 | 31/08/2020 | Cohort | 4 | 6   | 6   | 6   | 6   | PCR-confirmed COVID-19                                    |
| Clinical findings and disease severity in hospitalized pregnant women with coronavirus disease 2019 (COVID-19).                                                     | 2020 | Savasi             | DOI: 10.1097/AOG.0000000000003979. | Italy  | 23/02/2020 | 28/03/2020 | Cohort | 5 | 77  | 77  | 57  | 57  | PCR-confirmed COVID-19                                    |
| Neonatal management and outcomes during the COVID-19 pandemic: an observation cohort study.                                                                         | 2020 | Salvatore          | DOI: 10.1016/S2352-4642(20)30235-2 | USA    | 22/03/2020 | 17/05/2020 | Cohort | 8 | 116 | 116 | 120 | 120 | PCR-confirmed COVID-19                                    |
| Maternal COVID-19 infection, clinical characteristics, pregnancy, and neonatal outcome: a prospective cohort study.                                                 | 2020 | Antoun             | DOI: 10.1016/j.ejogrb.2020.07.008  | UK     | 01/02/2020 | 01/04/2020 | Cohort | 6 | 23  | 23  | 20  | 20  | PCR-confirmed COVID-19                                    |
| Outcomes of maternal-newborn dyads after maternal SARS-CoV-2.                                                                                                       | 2020 | Verma              | DOI: 10.1542/peds.2020-005637      | USA    | 01/03/2020 | 10/05/2020 | Cohort | 6 | 149 | 149 | 149 | 149 | PCR-confirmed COVID-19                                    |
| Effects of severe acute respiratory syndrome coronavirus 2 infection on pregnant women and their infants: a retrospective study in Wuhan, China.                    | 2020 | Yang               | DOI: 10.5858/arpa.2020-0232-SA.    | China  | 20/01/2020 | 19/03/2020 | Cohort | 6 | 23  | 23  | 23  | 23  | PCR-confirmed COVID-19                                    |
| Coronavirus disease 2019 in pregnancy was associated with maternal morbidity and preterm birth.                                                                     | 2020 | Sentilhes          | DOI: 10.1016/j.ajog.2020.06.022.   | France | 01/03/2020 | 03/04/2020 | Cohort | 5 | 54  | 54  | 21  | 21  | PCR or clinical criteria based diagnosis of COVID-19      |
| Clinical characteristics of 46 pregnant women with a severe acute respiratory syndrome coronavirus 2                                                                | 2020 | Lokken             | DOI: 10.1016/j.ajog.2020.05.031.   | USA    | 21/01/2020 | 17/04/2020 | Cohort | 5 | 46  | 46  | 8   | 8   | PCR-confirmed COVID-19                                    |

|                                                                                                                                                                          |      |                    |                                         |           |            |            |        |   |      |      |      |      |                              |                                                                            |
|--------------------------------------------------------------------------------------------------------------------------------------------------------------------------|------|--------------------|-----------------------------------------|-----------|------------|------------|--------|---|------|------|------|------|------------------------------|----------------------------------------------------------------------------|
| infection in Washington state.                                                                                                                                           |      |                    |                                         |           |            |            |        |   |      |      |      |      |                              |                                                                            |
| SARS-CoV-2/COVID-19 infection in pregnancy and its outcome in a rural tertiary care centre of West Bengal.                                                               | 2020 | Saha               | WHO: covidwho-1001351                   | India     | Not stated | Not stated | Cohort | 5 | 3    | 3    | 3    | 3    | All women attending hospital | PCR-confirmed COVID-19                                                     |
| The impact of COVID-19 infection on labor and delivery, newborn nursery, and neonatal intensive care unit: prospective observational data from a single hospital system. | 2020 | Griffin            | DOI: 10.1055/s-0040-1713416             | USA       | 21/04/2020 | 05/05/2020 | Cohort | 8 | 27   | 27   | 27   | 27   |                              | PCR or clinical criteria based diagnosis of COVID-19                       |
| Clinical course of coronavirus disease-2019 in pregnancy.                                                                                                                | 2020 | Pereira            | WHO: covidwho-622517                    | Spain     | 14/03/2020 | 14/04/2020 | Cohort | 6 | 60   | 60   | 23   | 23   |                              | PCR-confirmed COVID-19                                                     |
| Pregnancy Outcomes in COVID-19: A Prospective Cohort Study in Singapore.                                                                                                 | 2020 | Mattar             | DOI: 10.47102/annals-acadmedsg.2020437. | Singapore | 15/03/2020 | 22/08/2020 | Cohort | 6 | 16   | 16   | 5    | 5    |                              | PCR-confirmed COVID-19                                                     |
| A pandemic center's experience of managing pregnant women with COVID-19 infection in Turkey: A prospective cohort study.                                                 | 2020 | Sahin              | DOI: 10.1002/ijgo.13318                 | Turkey    | 11/03/2020 | 11/06/2020 | Cohort | 7 | 29   | 29   | 10   | 10   |                              | PCR-confirmed COVID-19                                                     |
| Vertical Transmission of COVID-19 to the Neonate.                                                                                                                        | 2020 | Moreno             | DOI: 10.1155/2020/8460672               | USA       | 20/03/2020 | 30/04/2020 | Cohort | 6 | 19   | 19   | 21   | 21   |                              | PCR-confirmed COVID-19                                                     |
| Maternal and Neonatal Outcomes of Pregnant Women With Coronavirus Disease 2019 (COVID-19) Pneumonia: A Case-Control Study.                                               | 2020 | Li                 | DOI: 10.1093/cid/ciaa352.               | China     | 24/01/2020 | 29/02/2020 | Cohort | 6 | 16   | 16   | 17   | 17   |                              | PCR-confirmed COVID-19                                                     |
| Maternal and perinatal characteristics and outcomes of pregnancies complicated with COVID-19 in Kuwait.                                                                  | 2020 | Ayed               | DOI: 10.1186/s12884-020-03461-2         | Kuwait    | 15/03/2020 | 31/05/2020 | Cohort | 5 | 185  | 185  | 167  | 167  |                              | PCR-confirmed COVID-19                                                     |
| Pregnancy Outcomes Among Women With and Without Severe Acute Respiratory Syndrome Coronavirus 2 Infection.                                                               | 2020 | Adhikari           | DOI: 10.1001/jamanetworkopen.2020.29256 | USA       | 18/03/2020 | 22/08/2020 | Cohort | 8 | 252  | 252  | 251  | 251  |                              | PCR-confirmed COVID-19                                                     |
| SARS-CoV-2 screening of asymptomatic women admitted for delivery must be performed with a combination of microbiological techniques: an observational study.             | 2020 | Vinuela            | DOI: 10.37201/req/088.2020.             | Spain     | 06/05/2020 | 21/05/2020 | Cohort | 6 | 9    | 9    | 9    | 9    |                              | PCR-confirmed COVID-19                                                     |
| Disease severity and perinatal outcomes of pregnant patients with coronavirus disease 2019 (COVID-19).                                                                   | 2021 | Metz               | DOI: 10.1097/AOG.0000000000004339.      | USA       | 01/03/2020 | 31/07/2020 | Cohort | 6 | 1291 | 1291 | 1196 | 1196 |                              | PCR-confirmed COVID-19                                                     |
| Assessing disease outcome in COVID-19 pregnancies in a tertiary referral center in South India: a single-center retrospective cohort study.                              | 2020 | Nambiar            | DOI: 10.5005/jp-journals-10006-1822     | India     | 01/04/2020 | 01/09/2020 | Cohort | 5 | 350  | 350  | 253  | 254  |                              | Laboratory-confirmed COVID-19 infection, unclear of method of confirmation |
| Screening of severe acute respiratory syndrome coronavirus-2 infection during labor and delivery using polymerase chain reaction and immunoglobulin testing.             | 2021 | Saviron-Cornudella | DOI: 10.1016/j.jfs.2021.119200          | Spain     | 31/03/2020 | 30/09/2020 | Cohort | 6 | 22   | 22   | 22   | 22   |                              | PCR-confirmed COVID-19                                                     |

|                                                                                                                                                                           |      |                                                                   |                                         |               |            |            |              |   |     |     |     |     |                                                                                              |
|---------------------------------------------------------------------------------------------------------------------------------------------------------------------------|------|-------------------------------------------------------------------|-----------------------------------------|---------------|------------|------------|--------------|---|-----|-----|-----|-----|----------------------------------------------------------------------------------------------|
| Management of gestational diabetes in women with a concurrent severe acute respiratory syndrome coronavirus 2 infection, experience of a single center in northern Italy. | 2020 | D'Ambrosi                                                         | DOI: 10.1002/ijgo.13434                 | Italy         | 01/03/2020 | 30/04/2020 | Cohort       | 6 | 6   | 6   | 6   | 6   | PCR-confirmed COVID-19                                                                       |
| Epidemiology, management and risk of SARS-CoV-2 transmission in a cohort of newborns born to mothers diagnosed with COVID-19 infection.                                   | 2021 | Solis-Garcia                                                      | DOI: 10.1016/j.janpede.2020.12.006      | Spain         | 01/03/2020 | 17/08/2020 | Cohort       | 6 | 73  | 73  | 75  | 75  | PCR-confirmed COVID-19                                                                       |
| Outcomes of neonates born to mothers with severe acute respiratory syndrome coronavirus 2 infection at a large medical center in New York city.                           | 2021 | Dumitriu                                                          | DOI: 10.1001/jamapediatrics.2020.4298   | USA           | 13/03/2020 | 24/04/2020 | Cohort       | 6 | 100 | 100 | 101 | 101 | PCR or clinical criteria based diagnosis of COVID-19                                         |
| Neonates born to mothers with COVID-19: data from the Spanish society of neonatology registry.                                                                            | 2021 | Sanchez-Luna                                                      | DOI: 10.1542/peds.2020-015065           | Spain         | 08/03/2020 | 26/05/2020 | Cohort       | 6 | 493 | 493 | 503 | 503 | PCR or serology-confirmed COVID-19                                                           |
| Comparison of hematological parameters and perinatal outcomes between COVID-19 pregnancies and healthy pregnancy cohort.                                                  | 2021 | Koc                                                               | DOI: 10.1515/jpm-2020-0403              | Turkey        | 20/03/2020 | 25/07/2020 | Case-control | 7 | 39  | 39  | 39  | 39  | All pregnant women admitted<br>PCR-confirmed COVID-19                                        |
| SARS-CoV-2 in pregnancy: maternal and perinatal outcome data of 34 pregnant women hospitalised between may and October 2020.                                              | 2021 | Hall                                                              | DOI: 10.1515/jpm-2020-0499              | Austria       | 11/05/2020 | 14/10/2020 | Cohort       | 5 | 35  | 35  | 28  | 28  | PCR-confirmed COVID-19                                                                       |
| The Relationship between Status at Presentation and Outcomes among Pregnant Women with COVID-19.                                                                          | 2020 | London                                                            | DOI: 10.1055/s-0040-1712164             | USA           | 15/03/2020 | 10/04/2020 | Cohort       | 6 | 58  | 58  | 55  | 55  | PCR-confirmed COVID-19                                                                       |
| Analysis of vaginal delivery outcomes among pregnant women in Wuhan, China during the COVID-19 pandemic.                                                                  | 2020 | Liao                                                              | DOI: 10.1002/ijgo.13188                 | China         | 20/01/2020 | 02/03/2020 | Case-control | 7 | 10  | 10  | 10  | 10  | All pregnant women delivering during study period<br>COVID-19 diagnosed on clinical criteria |
| A multicenter study on epidemiological and clinical characteristics of 125 newborns born to women infected with COVID-19 by Turkish Neonatal Society.                     | 2021 | Oncel                                                             | DOI: 10.1007/s00431-020-03767-5         | Turkey        | 15/03/2020 | 15/06/2020 | Cohort       | 5 | 125 | 125 | 120 | 120 | PCR-confirmed COVID-19                                                                       |
| Assessment of Maternal and Neonatal SARS-CoV-2 Viral Load, Transplacental Antibody Transfer, and Placental Pathology in Pregnancies During the COVID-19 Pandemic.         | 2020 | Edlow                                                             | DOI: 10.1001/jamanetworkopen.2020.30455 | USA           | 02/04/2020 | 13/06/2020 | Cohort       | 8 | 64  | 64  | 64  | 64  | PCR-confirmed COVID-19                                                                       |
| Maternal and perinatal outcomes of pregnant women with SARS-CoV-2 infection.                                                                                              | 2021 | World Association of Perinatal Medicine Working Group on COVID-19 | DOI: 10.1002/uog.23107                  | Multiple      | 01/02/2020 | 30/04/2020 | Cohort       | 6 | 388 | 388 | 266 | 266 | PCR-confirmed COVID-19                                                                       |
| Impact of the Coronavirus Infection in Pregnancy: A Preliminary Study of 141 Patients.                                                                                    | 2020 | Nayak                                                             | DOI: 10.1007/s13224-020-01335-3         | India         | 01/04/2020 | 15/05/2020 | Cohort       | 7 | 141 | 141 | 131 | 131 | PCR-confirmed COVID-19                                                                       |
| Perinatal COVID-19 in Latin America.                                                                                                                                      | 2020 | Sola                                                              | DOI: 10.26633/RPSP.2020.47              | Latin America | 06/03/2020 | 30/05/2020 | Cohort       | 5 | 86  | 86  | 86  | 86  | All pregnant women<br>PCR-confirmed COVID-19                                                 |
| Clinical characteristics, maternal and neonatal                                                                                                                           | 2021 | Ozsurmeli                                                         | DOI: 10.4149/BLL_2021_023               | Turkey        | 11/03/2020 | 01/07/2020 | Cohort       | 6 | 24  | 24  | 10  | 10  | PCR-confirmed COVID-19                                                                       |

|                                                                                                                                                                |      |               |                                    |               |            |            |              |   |      |      |      |      |                                        |  |                                    |
|----------------------------------------------------------------------------------------------------------------------------------------------------------------|------|---------------|------------------------------------|---------------|------------|------------|--------------|---|------|------|------|------|----------------------------------------|--|------------------------------------|
| outcomes of pregnant women with SARS-CoV-2 infection in Turkey.                                                                                                |      |               |                                    |               |            |            |              |   |      |      |      |      |                                        |  |                                    |
| Maternal, fetal and neonatal outcomes of large series of SARS-CoV-2 positive pregnancies in peripartum period: A single-center prospective comparative study.  | 2021 | Hcini         | DOI: 10.1016/j.ejogrb.2020.11.068  | French Guiana | 16/06/2020 | 16/08/2020 | Cohort       | 6 | 137  | 137  | 127  | 127  |                                        |  | PCR-confirmed COVID-19             |
| Perinatal outcomes and serological results in neonates of pregnant women seropositive to SARS-CoV-2: A cross-sectional descriptive study.                      | 2020 | Davila-Aliaga | DOI: 10.5867/medwave.2020.11.8084. | Peru          | 15/04/2020 | 10/05/2020 | Cohort       | 5 | 114  | 114  | 114  | 114  | All pregnant women admitted            |  | Serological diagnosis of COVID-19  |
| Clinical Stratification of Pregnant COVID-19 Patients based on Severity: A Single Academic Center Experience.                                                  | 2021 | Berry         | DOI: 10.1055/s-0041-1723761        | USA           | 01/03/2020 | 01/07/2020 | Cohort       | 6 | 91   | 91   | 60   | 60   | All pregnant women admitted            |  | PCR-confirmed COVID-19             |
| Pregnancy and neonatal outcomes of COVID-19: coreporting of common outcomes from PAN-COVID and AAP-SONPM registries.                                           | 2021 | Mullins       | DOI: 10.1002/uog.23619             | Worldwide     | 01/01/2020 | 25/07/2020 | Cohort       | 7 | 3050 | 3050 | 3050 | 3050 | All pregnant women                     |  | PCR-confirmed COVID-19             |
| Updated experience of a tertiary pandemic center on 533 pregnant women with COVID-19 infection: A prospective cohort study from Turkey.                        | 2021 | Sahin Surel   | DOI: 10.1002/ijgo.13460            | Turkey        | 11/03/2020 | 10/09/2020 | Cohort       | 6 | 533  | 533  | 131  | 131  |                                        |  | PCR-confirmed COVID-19             |
| Maternal and Neonatal Outcomes of COVID-19 in Pregnancy: A Single-Centre Observational Study.                                                                  | 2021 | Singh         | DOI: 10.7759/cureus.13184.         | India         | 15/05/2020 | 15/11/2020 | Cohort       | 6 | 132  | 132  | 125  | 125  |                                        |  | PCR-confirmed COVID-19             |
| Characteristics and outcomes of neonatal SARS-CoV-2 infection in the UK: a prospective national cohort study using active surveillance.                        | 2021 | Gale          | DOI: 10.1016/S2352-4642(20)30342-4 | UK            | 01/03/2020 | 30/04/2020 | Cohort       | 8 | 17   | 17   | 66   | 66   | All neonates with confirmed SARS-CoV-2 |  | PCR-confirmed COVID-19             |
| COVID-19 in a cohort of pregnant women and their descendants, the MOACC-19 study.                                                                              | 2021 | Llorca        | DOI: 10.1136/bmjopen-2020-044224   | Spain         | 23/05/2020 | 22/10/2020 | Cohort       | 6 | 14   | 14   | 14   | 14   |                                        |  | PCR-confirmed COVID-19             |
| Coronavirus disease 2019 in pregnancy                                                                                                                          | 2020 | Qiancheng     | DOI: 10.1016/j.ijid.2020.04.065    | China         | 15/01/2020 | 15/03/2020 | Cohort       | 6 | 82   | 82   | 23   | 23   |                                        |  | PCR-confirmed COVID-19             |
| Clinical analysis of ten pregnant women with COVID-19 in Wuhan, China: A retrospective study                                                                   | 2020 | Cao           | DOI: 10.1016/j.ijid.2020.04.047    | China         | 23/01/2020 | 23/02/3030 | Cohort       | 5 | 10   | 10   | 10   | 10   |                                        |  | PCR-confirmed COVID-19             |
| Maternal, Perinatal and Neonatal Outcomes with COVID-19: A Multicenter Study of 242 Pregnancies and Their 248 Infant Newborns during Their First Month of Life | 2020 | Marin Gabriel | DOI: 10.1097/INF.0000000000002902  | Spain         | 13/03/2020 | 31/05/2020 | Cohort       | 6 | 242  | 242  | 248  | 248  |                                        |  | PCR or serology-confirmed COVID-19 |
| Clinical course of novel COVID-19 infection in pregnant women                                                                                                  | 2020 | Shmakov       | DOI: 10.1080/14767058.2020.1850683 | Russia        | Not stated | Not stated | Cohort       | 5 | 66   | 66   | 42   | 42   | All pregnant women admitted            |  | PCR-confirmed COVID-19             |
| Vaginal delivery in SARS-CoV-2-infected pregnant women in Israel: a multicenter prospective analysis                                                           | 2020 | Rottenstreich | DOI: 10.1007/s00404-020-05854-2    | Israel        | 15/03/2020 | 04/07/2020 | Cohort       | 6 | 52   | 52   | 52   | 52   |                                        |  | PCR-confirmed COVID-19             |
| Clinical Analysis of Neonates Born to Mothers with or without COVID-19: A                                                                                      | 2020 | Liu           | DOI: 10.1055/s-0040-1716505        | China         | 17/01/2020 | 04/03/2020 | Case-control | 6 | 31   | 15   | 31   | 15   |                                        |  | PCR or radiological                |



|                                                                                                                           |      |                 |                                         |        |            |            |              |   |      |      |      |      |                                                   |  |                                                        |
|---------------------------------------------------------------------------------------------------------------------------|------|-----------------|-----------------------------------------|--------|------------|------------|--------------|---|------|------|------|------|---------------------------------------------------|--|--------------------------------------------------------|
| Retrospective Analysis of 48 Cases from Two Neonatal Intensive Care Units in Hubei Province                               |      |                 |                                         |        |            |            |              |   |      |      |      |      |                                                   |  | diagnosis of COVID-19                                  |
| Characteristics of Newborns Born to SARS-CoV-2-Positive Mothers: A Retrospective Cohort Study                             | 2020 | Farghaly        | DOI: 10.1055/s-0040-1715862             | USA    | 01/03/2020 | 01/05/2020 | Case-control | 8 | 79   | 15   | 79   | 15   |                                                   |  | PCR-confirmed COVID-19                                 |
| Poor maternal-neonatal outcomes in pregnant patients with confirmed SARS-Cov-2 infection: analysis of 145 cases           | 2021 | Di Guardo       | DOI: 10.1007/s00404-020-05909-4         | Italy  | 01/03/2020 | 01/07/2020 | Cohort       | 6 | 145  | 145  | 145  | 145  |                                                   |  | PCR-confirmed COVID-19                                 |
| Coronavirus and birth in Italy: results of a national population-based cohort study                                       | 2020 | Maraschini      | DOI: 10.4415/ANN_20_03_17.              | Italy  | 25/02/2020 | 22/04/2020 | Cohort       | 7 | 146  | 146  | 147  | 147  |                                                   |  | PCR, serological or radiological diagnosis of COVID-19 |
| Infant Outcomes Following Maternal Infection with SARS-CoV-2: First Report from the PRIORITY Study                        | 2020 | Flaherman       | DOI: 10.1093/cid/ciaa1411               | USA    | 22/03/2020 | 22/06/2020 | Case-control | 8 | 263  | 179  | 263  | 179  |                                                   |  | PCR-confirmed COVID-19                                 |
| Incidence and clinical profiles of COVID-19 pneumonia in pregnant women: A single-centre cohort study from Spain          | 2020 | San-Juan        | DOI: 10.1016/j.eclinm.2020.100407       | Spain  | 05/03/2020 | 05/04/2020 | Cohort       | 6 | 52   | 52   | 6    | 6    |                                                   |  | PCR-confirmed COVID-19                                 |
| Vaginal delivery in SARS-CoV-2-infected pregnant women in Northern Italy: a retrospective analysis                        | 2020 | Ferrazzi        | DOI: 10.1111/1471-0528.16278            | Italy  | 01/03/2020 | 20/03/2020 | Cohort       | 6 | 42   | 42   | 42   | 42   |                                                   |  | PCR-confirmed COVID-19                                 |
| Obstetric Outcomes of SARS-CoV-2 Infection in Asymptomatic Pregnant Women                                                 | 2021 | Cruz-Lemini     | DOI: 10.3390/v13010112.                 | Spain  | 23/03/2020 | 31/03/2020 | Case-control | 8 | 604  | 174  | 604  | 174  |                                                   |  | PCR-confirmed COVID-19                                 |
| SARS-CoV-2 infection in pregnancy and newborn in a Spanish multicentric cohort (GESNEO-COVID)                             | 2020 | Carrasco        | DOI: doi.org/10.1186/s12884-021-03784-8 | Spain  | 15/03/2020 | 31/07/2020 | Cohort       | 6 | 105  | 105  | 107  | 107  |                                                   |  | PCR or serology-confirmed COVID-19                     |
| Clinical course of severe and critical coronavirus disease 2019 in hospitalized pregnancies: a United States cohort study | 2020 | Pierce-Williams | DOI: 10.1016/j.ajogmf.2020.100134       | USA    | 05/03/2020 | 20/04/2020 | Cohort       | 6 | 64   | 64   | 33   | 33   |                                                   |  | PCR-confirmed COVID-19                                 |
| Rates of seroprevalance of COVID-19 among pregnant patients in New York City                                              | 2021 | Baptiste        | DOI: 10.1016/j.ajog.2020.12.944         | USA    | 24/06/2020 | 16/07/2020 | Cohort       | 6 | 47   | 19   | 47   | 19   |                                                   |  | PCR or serology-confirmed COVID-19                     |
| Maternal and neonatal outcomes of pregnant patients with coronavirus disease 2019 (COVID-19): A multistate cohort         | 2021 | Metz            | DOI: 10.1016/j.ajog.2020.12.1204        | USA    | 01/03/2020 | 31/07/2020 | Cohort       | 6 | 1219 | 1219 | 1196 | 1196 |                                                   |  | PCR or serology-confirmed COVID-19                     |
| Obstetrical and neonatal outcomes among pregnancies with SARS-CoV-2                                                       | 2021 | Trahan          | DOI: 10.1016/j.ajog.2020.12.385         | Canada | 22/03/2020 | 31/07/2020 | Case-control | 7 | 206  | 43   | 209  | 45   |                                                   |  | PCR-confirmed COVID-19                                 |
| Comparison of clinical outcomes in pregnant women with and without COVID-19 based on disease severity                     | 2021 | Gold            | DOI: 10.1016/j.ajog.2020.12.585         | USA    | 01/03/2020 | 01/07/2020 | Case-control | 4 | 486  | 91   | 486  | 91   | All pregnant women delivering during study period |  | Unclear                                                |
| Neonatal outcomes of COVID-19 positive mothers                                                                            | 2021 | Zarudskaya      | DOI: 10.1016/j.ajog.2020.12.568         | USA    | 01/03/2020 | 01/08/2020 | Case-control | 7 | 28   | 10   | 28   | 10   |                                                   |  | PCR-confirmed COVID-19                                 |
| Perinatal outcomes of asymptomatic versus symptomatic COVID positive pregnant women                                       | 2021 | Andrikopoulou   | DOI: 10.1016/j.ajog.2020.12.097         | USA    | 12/03/2020 | 12/08/2020 | Cohort       | 6 | 157  | 157  | 156  | 156  |                                                   |  | PCR-confirmed COVID-19                                 |
| Neonatal outcomes in pregnant women with diagnosis of COVID-19                                                            | 2021 | Izewski         | DOI: 10.1016/j.ajog.2020.12.809         | USA    | 01/03/2020 | 31/03/2020 | Case-control | 7 | 515  | 460  | 55   | 55   |                                                   |  | PCR-confirmed COVID-19                                 |

|                                                                                                                                                                                          |      |                |                                         |              |            |            |              |   |      |     |      |     |                                    |
|------------------------------------------------------------------------------------------------------------------------------------------------------------------------------------------|------|----------------|-----------------------------------------|--------------|------------|------------|--------------|---|------|-----|------|-----|------------------------------------|
| Infant outcomes and maternal COVID-19 status at delivery                                                                                                                                 | 2021 | Zgutka         | DOI: 10.1515/jpm-2020-0481.             | USA          | 15/03/2020 | 15/06/2020 | Case-control | 5 | 184  | 60  | 186  | 62  | PCR-confirmed COVID-19             |
| Initial review of pregnancy and neonatal outcomes of pregnant women with COVID-19 infection                                                                                              | 2021 | Ogamba         | DOI: 10.1515/jpm-2020-0446              | USA          | 17/03/2020 | 04/06/2020 | Cohort       | 6 | 40   | 40  | 25   | 25  | PCR or serology-confirmed COVID-19 |
| Impact of SARS-CoV-2 Infection on Pregnancy Outcomes: A Population-Based Study                                                                                                           | 2021 | Crovetto       | DOI: 10.1093/cid/ciab104                | Spain        | 15/03/2020 | 31/05/2020 | Case-control | 8 | 2225 | 317 | 1338 | 178 | PCR or serology-confirmed COVID-19 |
| Management and short-term outcomes of infants born to mothers with active perinatal covid-19 infection                                                                                   | 2021 | Lamba          | DOI: 10.1186/s12887-021-02872-0         | USA          | 01/04/2020 | 01/10/2020 | Cohort       | 5 | 43   | 43  | 43   | 43  | PCR-confirmed COVID-19             |
| Maternal and perinatal outcomes of pandemic Covid-19 in pregnancy in Basrah                                                                                                              | 2021 | Sharief        | ISSN: 2515-8260                         | Iraq         | 15/03/2020 | 01/11/2020 | Cohort       | 6 | 135  | 135 | 110  | 110 | PCR-confirmed COVID-19             |
| Maternal, neonatal and placental characteristics of SARS-CoV-2 positive mothers                                                                                                          | 2021 | Zhang          | DOI: 10.1080/14767058.2021.1892637      | USA          | 01/03/2020 | 01/08/2020 | Case-control | 8 | 219  | 142 | 219  | 142 | PCR-confirmed COVID-19             |
| Disease severity, pregnancy outcomes, and maternal deaths among pregnant patients with severe acute respiratory syndrome coronavirus 2 infection in Washington State                     | 2021 | Lokken         | DOI: 10.1016/j.ajog.2020.12.1221        | USA          | 01/03/2020 | 30/06/2020 | Cohort       | 6 | 240  | 240 | 156  | 156 | PCR-confirmed COVID-19             |
| Maternal and perinatal outcomes in high vs low risk-pregnancies affected by SARS-COV-2 infection (Phase-2): The WAPM (World Association of Perinatal Medicine) working group on COVID-19 | 2021 | D'Antonio      | DOI: 10.1016/j.ajogmf.2021.100329       | 25 countries | 04/04/2020 | 28/10/2020 | Cohort       | 6 | 887  | 887 | 874  | 874 | PCR-confirmed COVID-19             |
| Epidemiology of coronavirus disease 2019 in pregnancy: risk factors and associations with adverse maternal and neonatal outcomes                                                         | 2021 | Brandt         | DOI: 10.1016/j.ajog.2020.09.043         | USA          | 11/03/2020 | 11/06/2020 | Case-control | 8 | 183  | 122 | 184  | 123 | PCR-confirmed COVID-19             |
| Covid 19 infection in pregnant women and newborn infants at a single U.S. center: What disparities, testing and isolation practices can teach US                                         | 2020 | Camelo         | DOI: 10.1093/ofid/ofaa439.718           | USA          | 31/03/2020 | 17/06/2020 | Cohort       | 6 | 36   | 36  | 32   | 32  | PCR-confirmed COVID-19             |
| The association between SARS-CoV-2 infection and preterm delivery: a prospective study with a multivariable analysis                                                                     | 2021 | Martinez-Perez | DOI: 10.1186/s12884-021-03742-4         | Spain        | 23/03/2020 | 31/05/2020 | Case-control | 8 | 1009 | 246 | 1009 | 246 | PCR-confirmed COVID-19             |
| Pregnancy Outcomes among Women with and without Severe Acute Respiratory Syndrome Coronavirus 2 Infection                                                                                | 2020 | Adhikari       | DOI: 10.1001/jamanetworkopen.2020.29256 | USA          | 18/03/2020 | 22/08/2020 | Case-control | 8 | 3374 | 252 | 3263 | 248 | PCR-confirmed COVID-19             |
| Clinicolaboratory profile of and outcomes in neonates born to covid-19-positive mothers                                                                                                  | 2021 | Sehra          | ISSN: 0972-2408                         | India        | 13/04/2020 | 31/07/2020 | Cohort       | 6 | 120  | 120 | 120  | 120 | PCR-confirmed COVID-19             |
| Clinical Profile, Viral Load, Maternal-Fetal Outcomes of Pregnancy With COVID-19: 4-Week Retrospective, Tertiary Care Single-Centre Descriptive Study                                    | 2021 | Bachani        | DOI: 10.1016/j.jogc.2020.09.021         | India        | 05/05/2020 | 05/06/2020 | Cohort       | 6 | 57   | 57  | 56   | 56  | PCR-confirmed COVID-19             |

|                                                                                                                                                   |      |                                                                   |                                    |          |            |            |              |   |      |      |      |      |                                                      |
|---------------------------------------------------------------------------------------------------------------------------------------------------|------|-------------------------------------------------------------------|------------------------------------|----------|------------|------------|--------------|---|------|------|------|------|------------------------------------------------------|
| Management and Early Outcomes of Neonates Born to Women with SARS-CoV-2 in 16 US Hospitals                                                        | 2021 | Congdon                                                           | DOI: 10.1055/s-0041-1726036        | USA      | 01/03/2020 | 01/05/2020 | Cohort       | 6 | 70   | 70   | 70   | 70   | PCR-confirmed COVID-19                               |
| Maternal and neonatal outcomes of pregnant patients with COVID-19: A prospective cohort study                                                     | 2021 | Abedzadeh-Kalahrudi                                               | DOI: 10.1002/ijgo.13661            | Iran     | 01/03/2020 | 01/11/2020 | Case-control | 8 | 150  | 56   | 149  | 55   | PCR-confirmed COVID-19                               |
| Multicentre Spanish study found no incidences of viral transmission in infants born to mothers with COVID-19                                      | 2020 | Marin Gabriel                                                     | DOI: 10.1111/apa.15474             | Spain    | 13/03/2020 | 29/03/2020 | Cohort       | 6 | 42   | 42   | 42   | 42   | PCR-confirmed COVID-19                               |
| SARS-CoV-2 Infection during Pregnancy in a Rural Midwest All-delivery Cohort and Associated Maternal and Neonatal Outcomes                        | 2021 | Steffen                                                           | DOI: 10.1055/s-0041-1723938        | USA      | 01/05/2020 | 22/09/2020 | Case-control | 8 | 1000 | 61   | 1021 | 62   | PCR-confirmed COVID-19                               |
| Maternal and perinatal outcomes of pregnant women with SARS-CoV-2 infection                                                                       | 2021 | World Association of Perinatal Medicine Working Group on COVID-19 | DOI: 10.1002/uog.23107             | Multiple | 01/02/2020 | 30/04/2020 | Cohort       | 6 | 388  | 388  | 251  | 251  | PCR-confirmed COVID-19                               |
| A single-center observational study on clinical features and outcomes of 21 SARS-CoV-2-infected neonates from India                               | 2021 | Nanavati                                                          | DOI: 10.1007/s00431-021-03967-7    | India    | 15/04/2020 | 31/07/2020 | Cohort       | 6 | 122  | 122  | 125  | 125  | PCR-confirmed COVID-19                               |
| Perinatal outcomes in pregnant women with COVID-19 in Siberia and the Russian Far East                                                            | 2021 | Artymuk                                                           | DOI: 10.1080/14767058.2021.1881954 | Russia   | Not stated | 25/12/2020 | Cohort       | 5 | 8485 | 8485 | 2383 | 2383 |                                                      |
| Prevalence and Risk Factors of Neonatal Covid-19 Infection: A Single-Centre Observational Study                                                   | 2021 | Ajith                                                             | DOI: 10.1007/s13224-021-01436-7    | India    | 15/04/2020 | 15/10/2020 | Cohort       | 6 | 350  | 350  | 223  | 223  | PCR-confirmed COVID-19                               |
| Impact of Covid-19 in pregnancy on mother's psychological status and infant's neurobehavioral development: a longitudinal cohort study in China.  | 2020 | Wang                                                              | DOI: 10.1186/s12916-020-01825-1    | China    | 01/05/2020 | 31/07/2020 | Cohort       | 6 | 72   | 72   | 57   | 57   | PCR-confirmed COVID-19                               |
| Vertical Transmission of Novel Coronavirus (COVID-19) from Mother to Newborn: Experience from a Maternity Unit, The Indus Hospital, Karachi.      | 2020 | Khan                                                              | DOI: 10.29271/jcpsp.2020.10.136    | Pakistan | 27/04/2020 | 16/06/2020 | Cohort       | 6 | 66   | 66   | 67   | 67   | PCR-confirmed COVID-19                               |
| Coronavirus disease 2019 in pregnant women: a report based on 116 cases.                                                                          | 2020 | Yan                                                               | DOI: 10.1016/j.ajog.2020.04.014    | China    | 20/01/2020 | 24/03/2020 | Cohort       | 6 | 116  | 116  | 100  | 100  | PCR or clinical criteria based diagnosis of COVID-19 |
| Clinical profile of SARS-CoV-2 infected neonates from a tertiary government hospital in Mumbai, India.                                            | 2020 | Kalamdani                                                         | DOI: 10.1007/s13312-020-2070-9     | India    | 01/04/2020 | 31/05/2020 | Cohort       | 5 | 185  | 185  | 185  | 185  | PCR-confirmed COVID-19                               |
| Clinical profile, viral load, management and outcome of neonates born to COVID 19 positive mothers: a tertiary care centre experience from India. | 2020 | Anand                                                             | DOI: 10.1007/s00431-020-03800-7    | India    | 01/04/2020 | 10/07/2020 | Cohort       | 6 | 69   | 69   | 65   | 65   | PCR-confirmed COVID-19                               |
| Clinical Manifestation and Neonatal Outcomes of Pregnant Patients With Coronavirus Disease 2019 Pneumonia in Wuhan, China.                        | 2020 | Xu                                                                | DOI: 10.1093/ofid/ofaa283          | China    | 15/01/2020 | 15/03/2020 | Cohort       | 6 | 64   | 64   | 23   | 23   | PCR-confirmed COVID-19                               |

|                                                                                                                                                         |      |               |                                             |        |            |            |              |   |        |      |        |      |                                                                    |
|---------------------------------------------------------------------------------------------------------------------------------------------------------|------|---------------|---------------------------------------------|--------|------------|------------|--------------|---|--------|------|--------|------|--------------------------------------------------------------------|
| Impact of SARS-CoV-2 on multiple gestation pregnancy.                                                                                                   | 2021 | Mahajan       | DOI: 10.1002/ijgo.13508                     | India  | 04/04/2020 | 10/09/2020 | Cohort       | 6 | 879    | 879  | 633    | 633  | PCR-confirmed COVID-19                                             |
| The impact of perinatal severe acute respiratory syndrome coronavirus 2 infection during the peripartum period.                                         | 2021 | Janssen       | DOI: 10.1016/j.ajogmf.2020.100267           | USA    | 25/03/2020 | 15/05/2020 | Cohort       | 6 | 180    | 180  | 180    | 180  | PCR-confirmed COVID-19                                             |
| Maternal and perinatal characteristics of pregnant women with COVID-19 in a national hospital in Lima, Peru                                             | 2020 | Huerta Saenz  | DOI: 10.31403/rpgo.v66i2245                 | Peru   | 24/03/2020 | 07/05/2020 | Cohort       | 6 | 37     | 37   | 35     | 35   | PCR or rapid test confirmed COVID-19                               |
| An initiative to evaluate the safety of maternal bonding in patients with SARS-CoV-2 infection                                                          | 2020 | Cojocarú      | DOI: 10.1080/14767058.2020.1828335          | USA    | 01/03/2020 | 01/06/2020 | Cohort       | 6 | 86     | 86   | 34     | 34   | PCR-confirmed COVID-19                                             |
| Short-term neonatal outcomes of colocating and breastfeeding infants of mothers who tested positive for sars-cov-2                                      | 2020 | Krishnan      | DOI: 10.1542/peds.147.3_MeetingAbstract.729 | USA    | 19/03/2020 | 22/04/2020 | Cohort       | 6 | 45     | 45   | 45     | 45   | PCR-confirmed COVID-19                                             |
| Impact of Maternal Severe Acute Respiratory Syndrome Coronavirus 2 Detection on Breastfeeding Due to Infant Separation at Birth                         | 2020 | Popofsky      | DOI: 10.1016/j.jpeds.2020.08.004            | USA    | 25/03/2020 | 30/05/2020 | Cohort       | 6 | 160    | 160  | 160    | 160  | PCR-confirmed COVID-19                                             |
| SARS-CoV-2 in pregnancy: characteristics and outcomes of hospitalized and non-hospitalized women due to COVID-19                                        | 2020 | Barbero       | DOI: 10.1080/14767058.2020.1793320          | Spain  | 03/03/2020 | 31/05/2020 | Cohort       | 6 | 23     | 23   | 23     | 23   | PCR-confirmed COVID-19                                             |
| Clinical characteristics of COVID-19 in pregnant women: A retrospective descriptive single-center study from a tertiary hospital in Muscat, Oman        | 2021 | Santhosh      | DOI: 10.1002/ijgo.13427                     | Oman   | 24/03/2020 | 31/07/2020 | Cohort       | 6 | 60     | 60   | 46     | 46   | PCR-confirmed COVID-19                                             |
| Clinical characteristics and pregnancy outcomes of women diagnosed with SARS-CoV-2 in London's most ethnically diverse borough: A cross-sectional study | 2021 | Milln         | DOI: 10.1177/1753495X20985403               | UK     | 12/03/2020 | 22/04/2020 | Cohort       | 6 | 32     | 32   | 30     | 30   | PCR-confirmed COVID-19                                             |
| Evaluation of cochlear functions in infants exposed to SARS-CoV-2 intrauterine                                                                          | 2021 | Celik         | DOI: 10.1016/j.amjoto.2021.102982           | Turkey | 01/03/2020 | 01/12/2020 | Cohort       | 8 | 73     | 37   | 73     | 37   | PCR-confirmed COVID-19                                             |
| Ultrasound and Doppler findings in pregnant SARS-CoV-2 positive women                                                                                   | 2021 | Soto-Torres   | DOI: 10.1002/uog.23642                      | USA    | 01/05/2020 | 31/08/2020 | Cohort       | 7 | 209    | 106  | 209    | 106  | PCR or rapid test confirmed COVID-19                               |
| Maternal and perinatal outcomes of pregnant women with SARS-CoV-2 infection at the time of birth in England: national cohort study                      | 2021 | GuroI-Urganci | DOI: 10.1016/j.ajog.2021.05.016             | UK     | 29/05/2020 | 31/01/2021 | Case-control | 7 | 342080 | 3527 | 338553 | 3527 | All pregnant women delivering singletons<br>PCR-confirmed COVID-19 |
| Clinical characteristics of pregnant women with COVID-19 in Wuhan, China                                                                                | 2020 | Chen          | DOI: 10.1056/NEJMc2009226                   | China  | 08/12/2019 | 20/03/2020 | Cohort       | 5 | 118    | 118  | 70     | 70   | All pregnant women<br>PCR or radiological diagnosis of COVID-19    |
| Clinical features and the maternal and neonatal outcomes of pregnant women with coronavirus 2019                                                        | 2020 | Nie           | DOI: 10.1101/2020.03.22.20041061            | China  | 01/01/2020 | 01/02/2020 | Cohort       | 5 | 33     | 33   | 28     | 28   | All pregnant women<br>PCR-confirmed COVID-19                       |
| Coronavirus disease 2019 among pregnant Chinese women: case series data on                                                                              | 2020 | Wu            | DOI: 10.1111/1471-0528.16276                | China  | 31/01/2020 | 09/03/2020 | Cohort       | 5 | 13     | 13   | 5      | 5    | All pregnant women admitted<br>PCR-confirmed COVID-19              |

|                                                                                                                                                                                                                                                                                                                                                                                                                                                                                                                                                                                                                                                                                                                                                                                                                                                                                                                                                                                                                                                                                                                                                                                                                                                                                                                                                                                                                                                                                                                                                                                                                                                                                                  |      |                |                                        |             |            |            |              |   |     |     |     |     |                                                   |                                                               |
|--------------------------------------------------------------------------------------------------------------------------------------------------------------------------------------------------------------------------------------------------------------------------------------------------------------------------------------------------------------------------------------------------------------------------------------------------------------------------------------------------------------------------------------------------------------------------------------------------------------------------------------------------------------------------------------------------------------------------------------------------------------------------------------------------------------------------------------------------------------------------------------------------------------------------------------------------------------------------------------------------------------------------------------------------------------------------------------------------------------------------------------------------------------------------------------------------------------------------------------------------------------------------------------------------------------------------------------------------------------------------------------------------------------------------------------------------------------------------------------------------------------------------------------------------------------------------------------------------------------------------------------------------------------------------------------------------|------|----------------|----------------------------------------|-------------|------------|------------|--------------|---|-----|-----|-----|-----|---------------------------------------------------|---------------------------------------------------------------|
| the safety of vaginal birth and breastfeeding<br>Severe acute respiratory syndrome coronavirus 2 (SARS-CoV-2) infection during pregnancy in China: a retrospective cohort study<br>Prevalence of SARS-CoV-2 among patients admitted for childbirth in southern Connecticut<br>Clinical characteristics of pregnant women with Coronavirus disease 2019 in Wuhan, China<br>COVID-19 during pregnancy: A case series from an universally tested population from the north of Portugal<br>Routine screening for SARS-CoV-2 in unselected pregnant women at delivery<br><br>COVID-19 in the second half of pregnancy: prevalence and clinical relevance<br>Racial-ethnic disparities and pregnancy outcomes in SARS-CoV-2 infection in a universally-tested cohort in Houston, Texas<br>Fetomaternal outcome in COVID-19 infected pregnant women: a preliminary clinical study<br>COVID-19 infection during pregnancy - maternal and perinatal outcomes: a tertiary care centre study<br>A study of breastfeeding practices, SARS-CoV-2 and its antibodies in the breast milk of mothers confirmed with COVID-19<br>Influence of race and ethnicity on severe acute respiratory syndrome coronavirus 2 (SARS-CoV-2) infection rates and clinical outcomes in pregnancy<br>Vertical transmission and materno-fetal outcomes in 13 patients with coronavirus disease 2019<br>Retrospective description of pregnant women infected with severe acute respiratory syndrome coronavirus 2, France<br><br>Maternal and Fetal Outcomes of Pregnant Women Infected with Coronavirus Based on Tracking the Results of 90-Days Data in Hazrat -E-Rasoul Akram Hospital, Iran<br>University of Medical Sciences | 2020 | Yin            | DOI: 10.1101/2020.04.07.20053744       | China       | 28/01/2020 | 28/02/2020 | Cohort       | 7 | 31  | 31  | 17  | 17  | All female patients                               | PCR-confirmed COVID-19                                        |
|                                                                                                                                                                                                                                                                                                                                                                                                                                                                                                                                                                                                                                                                                                                                                                                                                                                                                                                                                                                                                                                                                                                                                                                                                                                                                                                                                                                                                                                                                                                                                                                                                                                                                                  | 2020 | Campbell       | DOI: 10.1001/jama.2020.8904            | USA         | 02/04/2020 | 29/04/2020 | Cohort       | 7 | 770 | 30  | 770 | 30  | All pregnant women admitted for childbirth        | PCR-confirmed COVID-19                                        |
|                                                                                                                                                                                                                                                                                                                                                                                                                                                                                                                                                                                                                                                                                                                                                                                                                                                                                                                                                                                                                                                                                                                                                                                                                                                                                                                                                                                                                                                                                                                                                                                                                                                                                                  | 2020 | Cheng          | DOI: 10.1093/ofid/ofaa294              | China       | 15/01/2020 | 23/02/2020 | Cohort       | 6 | 111 | 111 | 17  | 17  | All pregnant women admitted                       | PCR-confirmed COVID-19                                        |
|                                                                                                                                                                                                                                                                                                                                                                                                                                                                                                                                                                                                                                                                                                                                                                                                                                                                                                                                                                                                                                                                                                                                                                                                                                                                                                                                                                                                                                                                                                                                                                                                                                                                                                  | 2020 | Doria          | DOI: 10.1016/j.ejogrb.2020.05.029      | Portugal    | 25/03/2020 | 15/04/2020 | Cohort       | 5 | 12  | 12  | 11  | 11  | All pregnant women admitted                       | PCR-confirmed COVID-19                                        |
|                                                                                                                                                                                                                                                                                                                                                                                                                                                                                                                                                                                                                                                                                                                                                                                                                                                                                                                                                                                                                                                                                                                                                                                                                                                                                                                                                                                                                                                                                                                                                                                                                                                                                                  | 2020 | Diaz-Corvillon | DOI: 10.1371/journal.pone.0239887      | Chile       | 27/04/2020 | 07/06/2020 | Case-control | 5 | 583 | 37  | 586 | 37  | All pregnant women admitted                       | PCR-confirmed COVID-19                                        |
|                                                                                                                                                                                                                                                                                                                                                                                                                                                                                                                                                                                                                                                                                                                                                                                                                                                                                                                                                                                                                                                                                                                                                                                                                                                                                                                                                                                                                                                                                                                                                                                                                                                                                                  | 2020 | Ruggiero       | DOI: 10.21203/rs.3.rs-34492/v1         | Italy       | 07/04/2020 | 06/05/2020 | Case-control | 6 | 315 | 28  | 315 | 28  | All pregnant women delivering during study period | PCR-confirmed COVID-19                                        |
|                                                                                                                                                                                                                                                                                                                                                                                                                                                                                                                                                                                                                                                                                                                                                                                                                                                                                                                                                                                                                                                                                                                                                                                                                                                                                                                                                                                                                                                                                                                                                                                                                                                                                                  | 2020 | Pineles        | DOI: 10.1016/j.ejogrb.2020.09.012      | USA         | 22/04/2020 | 22/07/2020 | Case-control | 7 | 935 | 77  | 935 | 77  | All pregnant women admitted for childbirth        | PCR-confirmed COVID-19                                        |
|                                                                                                                                                                                                                                                                                                                                                                                                                                                                                                                                                                                                                                                                                                                                                                                                                                                                                                                                                                                                                                                                                                                                                                                                                                                                                                                                                                                                                                                                                                                                                                                                                                                                                                  | 2020 | Shah           | DOI: 10.18203/2320-1770.ijrcog20203843 | India       | 15/04/2020 | 10/06/2020 | Cohort       | 5 | 125 | 125 | 96  | 96  | All pregnant women                                | PCR-confirmed COVID-19                                        |
|                                                                                                                                                                                                                                                                                                                                                                                                                                                                                                                                                                                                                                                                                                                                                                                                                                                                                                                                                                                                                                                                                                                                                                                                                                                                                                                                                                                                                                                                                                                                                                                                                                                                                                  | 2020 | Hassan         | DOI: 10.18203/2320-1770.ijrcog20203853 | India       | 01/03/2020 | 30/06/2020 | Cohort       | 5 | 38  | 38  | 37  | 37  | All pregnant women in third trimester             | PCR-confirmed COVID-19                                        |
|                                                                                                                                                                                                                                                                                                                                                                                                                                                                                                                                                                                                                                                                                                                                                                                                                                                                                                                                                                                                                                                                                                                                                                                                                                                                                                                                                                                                                                                                                                                                                                                                                                                                                                  | 2020 | Peng           | DOI: 10.1016/j.lanwpc.2020.100045      | China       | 10/02/2020 | 01/04/2020 | Case-control | 7 | 64  | 24  | 66  | 25  | All pregnant women                                | PCR-confirmed COVID-19                                        |
|                                                                                                                                                                                                                                                                                                                                                                                                                                                                                                                                                                                                                                                                                                                                                                                                                                                                                                                                                                                                                                                                                                                                                                                                                                                                                                                                                                                                                                                                                                                                                                                                                                                                                                  | 2020 | Emeruwa        | DOI: 10.1097/AOG.00000000000004088     | USA         | 13/03/2020 | 23/04/2020 | Cohort       | 5 | 100 | 100 | 100 | 100 | All pregnant women delivering during study period | PCR-confirmed COVID-19                                        |
|                                                                                                                                                                                                                                                                                                                                                                                                                                                                                                                                                                                                                                                                                                                                                                                                                                                                                                                                                                                                                                                                                                                                                                                                                                                                                                                                                                                                                                                                                                                                                                                                                                                                                                  | 2020 | Masmejan       | DOI: 10.1016/j.cmi.2020.06.035         | Switzerland | 01/04/2020 | 06/05/2020 | Cohort       | 5 | 13  | 13  | 13  | 13  | All pregnant women admitted                       | PCR-confirmed SARS-CoV-2 or serology and positive contact     |
|                                                                                                                                                                                                                                                                                                                                                                                                                                                                                                                                                                                                                                                                                                                                                                                                                                                                                                                                                                                                                                                                                                                                                                                                                                                                                                                                                                                                                                                                                                                                                                                                                                                                                                  | 2020 | Vivanti        | DOI: 10.3201/eid2609.202144            | France      | 12/03/2020 | 12/04/2020 | Cohort       | 5 | 100 | 100 | 36  | 36  | All pregnant women                                | PCR-confirmed SARS-CoV-2                                      |
|                                                                                                                                                                                                                                                                                                                                                                                                                                                                                                                                                                                                                                                                                                                                                                                                                                                                                                                                                                                                                                                                                                                                                                                                                                                                                                                                                                                                                                                                                                                                                                                                                                                                                                  | 2021 | Chaichian      | DOI: 10.30476/BEAT.2021.90434.1254     | Iran        | 08/03/2020 | 28/12/2020 | Cohort       | 5 | 14  | 14  | 13  | 13  | All pregnant women hospitalised                   | PCR-confirmed SARS-CoV-2 and/or typical radiological features |

|                                                                                                                                             |      |               |                                      |         |            |            |              |   |      |      |      |      |                                                   |                                                               |
|---------------------------------------------------------------------------------------------------------------------------------------------|------|---------------|--------------------------------------|---------|------------|------------|--------------|---|------|------|------|------|---------------------------------------------------|---------------------------------------------------------------|
| Clinical Characteristics, Management, and Short-Term Outcome of Neonates Born to Mothers with COVID-19 in a Tertiary Care Hospital in India | 2021 | Malik         | DOI: 10.1093/tropej/fmab054          | India   | 14/04/2020 | 31/07/2020 | Cohort       | 7 | 514  | 514  | 524  | 524  | All pregnant women delivering during study period | PCR-confirmed SARS-CoV-2                                      |
| Covid-19 and pregnancy: the experience of a tertiary maternity hospital                                                                     | 2021 | Antsaklis     | DOI: 10.1515/jpm-2021-0070           | Greece  | 01/03/2020 | 31/12/2020 | Cohort       | 5 | 40   | 40   | 35   | 35   | All pregnant women admitted                       | PCR-confirmed SARS-CoV-2                                      |
| Neonatal Outcomes in Pregnant Women Infected with COVID-19 in Babol, North of Iran: A Retrospective Study with Short-Term Follow-Up         | 2021 | Akbarian-Rad  | DOI: 10.1155/2021/9952701            | Iran    | 10/02/2020 | 20/05/2020 | Cohort       | 5 | 8    | 8    | 8    | 8    | All pregnant women admitted for childbirth        | PCR-confirmed SARS-CoV-2                                      |
| Maternal-perinatal outcomes in pregnant women with COVID-19 in a level III hospital in Peru                                                 | 2021 | Davila-Aliaga | DOI: 10.17843/rpmesp.2021.381.6358   | Peru    | 01/04/2020 | 30/06/2020 | Cohort       | 5 | 43   | 43   | 43   | 43   | All pregnant women delivering during study period | PCR-confirmed SARS-CoV-2                                      |
| Neonatal outcomes of pregnant women with COVID-19 in a developing country setup                                                             | 2021 | Nayak         | DOI: 10.1016/j.pedneo.2021.05.004    | India   | 01/05/2020 | 20/10/2020 | Cohort       | 5 | 162  | 162  | 165  | 165  | All pregnant women delivering during study period | PCR-confirmed SARS-CoV-2                                      |
| Maternal and Neonatal Outcomes of Pregnant Women with COVID-19: A Case-Control Study at a Tertiary Care Center in India                     | 2021 | Tadas         | DOI: 10.5005/jp-journals-10006-1850a | India   | 01/05/2020 | 31/08/2020 | Case-control | 7 | 362  | 181  | 362  | 187  | All pregnant women delivering during study period | PCR-confirmed SARS-CoV-2                                      |
| Pregnancy Outcomes and SARS-CoV-2 Infection: The Spanish Obstetric Emergency Group Study                                                    | 2021 | Melguizo      | DOI: 10.3390/v13050853               | Spain   | 26/02/2020 | 05/11/2020 | Case-control | 7 | 2954 | 1347 | 2954 | 1347 | All pregnant women                                | PCR-confirmed SARS-CoV-2                                      |
| Placental pathology in COVID-19 affected pregnant women: A prospective case-control study                                                   | 2021 | Tasca         | DOI: 10.1016/j.placenta.2021.04.002  | Italy   | 01/03/2020 | 31/08/2020 | Case-control | 7 | 128  | 64   | 128  | 64   | All pregnant women delivering during study period | PCR-confirmed SARS-CoV-2                                      |
| Obstetric, maternal, and neonatal outcomes in COVID-19 compared to healthy pregnant women in Iran: a retrospective, case-control study      | 2021 | Taghavi       | DOI: 10.1186/s43043-021-00059-2      | Iran    | 01/03/2020 | 30/11/2020 | Case-control | 7 | 110  | 55   | 110  | 55   | All pregnant women admitted                       | PCR-confirmed SARS-CoV-2 and/or typical radiological features |
| Vertical transmission of SARS-CoV2 during pregnancy: A high-risk cohort                                                                     | 2021 | Maeda         | DOI: 10.1002/pd.5980                 | Brazil  | 12/04/2020 | 30/09/2020 | Cohort       | 5 | 109  | 109  | 109  | 109  | All pregnant women admitted                       | PCR-confirmed SARS-CoV-2                                      |
| Consequences of Early Separation of Maternal-Newborn Dyad in Neonates Born to SARS-CoV-2 Positive Mothers: An Observational Study           | 2021 | Conti         | DOI: 10.3390/ijerph18115899          | Italy   | 01/04/2020 | 18/03/2021 | Cohort       | 6 | 37   | 37   | 37   | 37   | All pregnant women admitted                       | PCR-confirmed SARS-CoV-2                                      |
| Perinatal outcome and possible vertical transmission of coronavirus disease 2019: experience from North India                               | 2021 | Sharma        | DOI: 10.3345/cep.2020.01704          | India   | 01/04/2020 | 31/08/2020 | Cohort       | 5 | 41   | 41   | 44   | 44   | All pregnant women admitted                       | PCR-confirmed SARS-CoV-2                                      |
| The Relationship between Status at Presentation and Outcomes among Pregnant Women with COVID-19                                             | 2020 | London        | DOI: 10.1055/s-0040-1712164          | USA     | 15/03/2020 | 10/04/2020 | Cohort       | 6 | 55   | 55   | 55   | 55   | All pregnant women                                | PCR-confirmed SARS-CoV-2                                      |
| Association of SARS-CoV-2 Test Status and Pregnancy Outcomes                                                                                | 2020 | Ahlberg       | DOI: 10.1001/jama.2020.19124         | Sweden  | 25/03/2020 | 24/07/2020 | Case-control | 7 | 759  | 156  | 759  | 156  | All pregnant women delivering during study period | PCR-confirmed SARS-CoV-2                                      |
| Infants Born to Mothers with COVID-19 During Pregnancy: The First Four Months of the Pandemic                                               | 2020 | Murphy        | ISSN: 03323102                       | Ireland | 01/03/2020 | 01/07/2020 | Cohort       | 5 | 26   | 26   | 26   | 26   | All pregnant women delivering during study period | PCR-confirmed SARS-CoV-2                                      |

|                                                                                                                                                            |      |               |                                       |                  |            |            |              |   |        |      |        |      |                                                   |                          |
|------------------------------------------------------------------------------------------------------------------------------------------------------------|------|---------------|---------------------------------------|------------------|------------|------------|--------------|---|--------|------|--------|------|---------------------------------------------------|--------------------------|
| Characteristics and outcomes of COVID-19 pneumonia in pregnancy compared with infected nonpregnant women                                                   | 2021 | Vizheh        | DOI: 10.1002/ijgo.13697               | Iran             | 01/03/2020 | 31/10/2020 | Cohort       | 7 | 110    | 110  | 51     | 51   | All pregnant women admitted                       | PCR-confirmed SARS-CoV-2 |
| Comparing Infection Profiles of Expectant Mothers with COVID-19 and Impacts on Maternal and Perinatal Outcomes between the First Two Waves of the Pandemic | 2021 | Cunarro-Lopez | DOI: 10.3390/jpm11070599              | Spain            | 01/03/2020 | 03/11/2020 | Cohort       | 8 | 1295   | 1295 | 1295   | 1295 | All pregnant women delivering during study period | PCR-confirmed SARS-CoV-2 |
| Coronavirus disease 2019 in pregnancy: Maternal and perinatal outcome                                                                                      | 2021 | Agarwal       | DOI: 10.4103/jehp.jehp_954_20         | India            | 15/04/2020 | 30/06/2020 | Cohort       | 5 | 65     | 65   | 48     | 48   | All pregnant women admitted                       | PCR-confirmed SARS-CoV-2 |
| COVID-19 infection in pregnancy: a single center experience with 75 cases                                                                                  | 2021 | Cakirca       | DOI: 10.5603/GP.a2021.0118            | Turkey           | 01/04/2020 | 31/08/2020 | Cohort       | 5 | 75     | 75   | 34     | 34   | All pregnant women admitted                       | PCR-confirmed SARS-CoV-2 |
| Maternal and perinatal outcomes of pregnant women with SARS-CoV-2 infection at the time of birth in England: national cohort study                         | 2021 | Gurol-Urganc  | DOI: 10.1016/j.ajog.2021.05.016       | England          | 29/05/2020 | 31/01/2021 | Case-control | 7 | 342080 | 3527 | 302011 | 2555 | All pregnant women delivering singletons          | PCR-confirmed SARS-CoV-2 |
| Neonatal outcome following maternal infection with SARS-CoV-2 in Germany: COVID-19-Related Obstetric and Neonatal Outcome Study (CRONOS)                   | 2021 | Mand          | DOI: 10.1136/archdischild-2021-322100 | Germany, Austria | 03/04/2020 | 27/11/2020 | Cohort       | 5 | 435    | 435  | 435    | 435  | All pregnant women delivering during study period | PCR-confirmed SARS-CoV-2 |
| Ocular Assessments of a Series of Newborns Gestationally Exposed to Maternal COVID-19 Infection                                                            | 2021 | Kiappe        | DOI: 10.1001/jamaophthalmol.2021.1088 | Brazil           | 01/04/2020 | 30/11/2020 | Cohort       | 5 | 165    | 165  | 165    | 165  | All pregnant women delivering during study period | PCR-confirmed SARS-CoV-2 |
| Rooming-in, Breastfeeding and Neonatal Follow-up of Infants Born to Mothers with COVID-19                                                                  | 2021 | Brito         | DOI: 10.20344/amp.15441               | Portugal         | 01/04/2020 | 31/12/2020 | Cohort       | 5 | 77     | 77   | 77     | 77   | All pregnant women delivering during study period | PCR-confirmed SARS-CoV-2 |
